# Supplementary material
Source: PubMed Central journal article supplement (PMC544051)

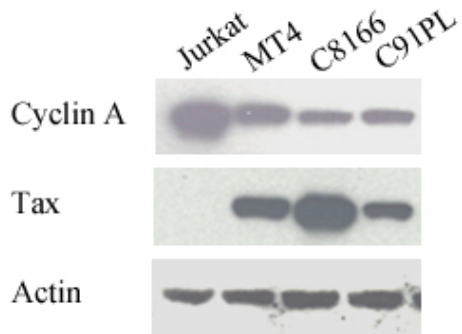

Supplement: pnas_102_1_63__2.pdf [file pnas_102_1_63__2.pdf]
